# Supplementary material for: The Interaction Effects of Meteorological Factors and Air Pollution on the Development of Acute Coronary Syndrome
Source: PubMed Central journal article supplement (PMC5343658; doi:10.1038/srep44004), 2017-03-09
Supplement: srep44004-s1.pdf [file srep44004-s1.pdf]

The Interaction Effects of Meteorological Factors and Air Pollution on the Development of Acute Coronary Syndrome

Ching-Hui Huang<sup>1, 2, 3, 4</sup>, Heng-Cheng Lin<sup>2</sup>, Chen-Dao Tsai<sup>1</sup>, Hung-Kai Huang<sup>1</sup>, Ie-Bin Lian<sup>2, \*</sup>, Chia-Chu Chang<sup>5, 6, 7, \*</sup>

1. Division of Cardiology, Department of Internal Medicine, Changhua Christian Hospital, Changhua, Taiwan.
2. Institute of Statistics and Information Science, National Changhua University of Education, Changhua, Taiwan.
3. School of Medicine, College of Medicine, Kaohsiung Medical University, Kaohsiung, Taiwan.
4. Department of Beauty Science and Graduate Institute of Beauty Science Technology, Chienkuo Technology University, Changhua, Taiwan.
5. Division of Nephrology, Department of Internal Medicine, Changhua Christian Hospital, Changhua, Taiwan.
6. School of Medicine, Chung Shan Medical University, Taichung, Taiwan.
7. Medical Research Center, Department of Internal Medicine, Changhua Christian Hospital, Changhua, Taiwan.

Supplementary Table 1: Daily meteorological and air quality conditions and distribution of ACS patients

|                      | high T (>26°C)   |                   | mild T (21–26°C) |                 | low T (<21°C) |                 | p-value |
|----------------------|------------------|-------------------|------------------|-----------------|---------------|-----------------|---------|
|                      | low AP(<1009hpb) | high AP(≥1009hpb) | low AP           | high AP         | low AP        | high AP         |         |
| Heart Rate(beat/min) | 81.44±21.49      | 78.96±23.13       | 84.22±23.88      | 83.77±21.59     | 93.25±39.81   | 81.91±23.23     | 0.037   |
| Blood Pressure       |                  |                   |                  |                 |               |                 |         |
| Systolic             | 137.73±31.29     | 136.54±31.03      | 143.08±36.53     | 139.28±31.87    | 134.31±30.6   | 140.42±33.82    | 0.084   |
| Diastolic            | 81.5±20.65       | 77.17±18.18       | 83.79±21.32      | 81.55±20.68     | 79.81±19.23   | 81.2±21.32      | 0.225   |
| Smoker               |                  |                   |                  |                 |               |                 |         |
| Current              | 537/1280(41.95%) | 27/53(50.94%)     | 172/372(46.24%)  | 196/487(40.25%) | 5/14(35.71%)  | 369/903(40.86%) | 0.551   |
| Former               | 222/1280(17.34%) | 6/53(11.32%)      | 53/372(14.25%)   | 80/487(16.43%)  | 4/14(28.57%)  | 161/903(17.83%) |         |
| Never                | 521/1280(40.7%)  | 20/53(37.74%)     | 147/372(39.52%)  | 211/487(43.33%) | 5/14(35.71%)  | 373/903(41.31%) |         |
| Family History       | 215/929(23.14%)  | 8/46(17.39%)      | 73/293(24.91%)   | 80/385(20.78%)  | 3/11(27.27%)  | 159/718(22.14%) | 0.004   |
| Known CAD            | 299/1306(22.89%) | 13/54(24.07%)     | 96/380(25.26%)   | 129/489(26.38%) | 2/16(12.5%)   | 234/919(25.46%) | 0.468   |
| Previous MI          | 124/292(42.47%)  | 4/13(30.77%)      | 39/92(42.39%)    | 52/127(40.94%)  | 0/2(0%)       | 93/231(40.26%)  | 0.803   |
| Previous PCI         | 205/296(69.26%)  | 8/13(61.54%)      | 66/91(72.53%)    | 79/126(62.7%)   | 2/2(100%)     | 168/233(72.1%)  | 0.398   |
| Previous CABG        | 37/294(12.59%)   | 1/13(7.69%)       | 5/91(5.49%)      | 15/128(11.72%)  | 0/2(0%)       | 28/231(12.12%)  | 0.53    |

Supplementary Table 2: Optimal cut points for temperature (T) and air pressure (AP) determined by quasi-likelihood under the independence model criterion (QIC) of logistic regression

| Cut point |       |        | QIC       | AUC    | Days of high t<br>high AP | Days of low t<br>low AP |
|-----------|-------|--------|-----------|--------|---------------------------|-------------------------|
| AP        | Low T | High T |           |        |                           |                         |
| 1010      | 22    | 27     | 13446.58* | 0.758  | 270                       | 643                     |
| 1010      | 21    | 27     | 13452.29  | 0.7576 | 270                       | 388                     |
| 1010      | 20    | 27     | 13461.06  | 0.7567 | 270                       | 249                     |
| 1010      | 23    | 27     | 13448.54  | 0.7576 | 270                       | 969                     |
| 1010      | 24    | 27     | 13450.43  | 0.7574 | 270                       | 1452                    |
| 1010      | 22    | 26     | 13465.56  | 0.7578 | 471                       | 643                     |
| 1009      | 22    | 26     | 13480.33  | 0.757  | 748                       | 325                     |
| 1010      | 22    | 25     | 13470.52  | 0.7571 | 778                       | 643                     |
| 1010      | 21    | 26     | 13470.74  | 0.7575 | 471                       | 388                     |
| 1009      | 21    | 26     | 13483.23  | 0.7568 | 748                       | 164                     |
| 1011      | 21    | 26     | 13501.01  | 0.7556 | 238                       | 865                     |
| 1011      | 22    | 27     | 13480.45  | 0.7561 | 120                       | 1233                    |
| 1009      | 22    | 27     | 13474.38  | 0.757  | 425                       | 325                     |
| 1009      | 23    | 27     | 13473.39  | 0.7569 | 425                       | 550                     |

Supplementary Table 3. Interactions of temperature with air pressure (AP), relative humidity (RH) and air pollutants for ACS: odds ratio (OR) of AP, RH, PM<sub>10</sub> and CO (from Model (1)), and PM<sub>2.5</sub> and NO<sub>2</sub> (from Model (2)) in different temperature strata, after adjusting the offsets by hospital (1010 hPa, 22 and 26 °C)

| <i>Model (1)</i>    | High temperature           |               | Mild temperature    |         | Low temperature            |                  |
|---------------------|----------------------------|---------------|---------------------|---------|----------------------------|------------------|
|                     | OR* (95%CI)                | p-value       | OR (95%CI)          | p-value | OR (95%CI)                 | p-value          |
| Low AP : High AP    | <b>3.868 (1.844,8.116)</b> | <b>0.0003</b> | 1.165 (0.940,1.443) | 0.164   | 0.751 (0.540,1.045)        | 0.089            |
| RH per 1 % ↑        | 0.994 (0.981,1.008)        | 0.395         | 0.993 (0.940,1.443) | 0.2     | <b>1.018 (1.009,1.027)</b> | <b>0.0001</b>    |
| PM10 per 10µg/m3 ↑  | 0.974 (0.940,0.010)        | 0.16          | 1.003 (0.977,1.029) | 0.808   | <b>1.032 (1.008,1.057)</b> | <b>0.009</b>     |
| CO per 1 ppm ↑      | 0.903 (0.625,1.304)        | 0.585         | 1.081 (0.771,1.516) | 0.652   | <b>1.124 (1.014,1.246)</b> | <b>0.026</b>     |
| <i>Model (2)</i>    | High temperature           |               | Mild temperature    |         | Low temperature            |                  |
|                     | OR*(95%CI)                 | p-value       | OR(95%CI)           | p-value | OR(95%CI)                  | p-value          |
| Low AP : High AP    | <b>3.774 (1.803,7.902)</b> | <b>0.0004</b> | 1.164 (0.944,1.435) | 0.155   | 0.750 (0.537,1.047)        | 0.091            |
| RH per 1% ↑         | 0.993 (0.979,1.007)        | 0.319         | 0.994 (0.983,1.004) | 0.217   | <b>1.018 (1.009,1.027)</b> | <b>&lt;.0001</b> |
| PM2.5 per 10µg/m3 ↑ | 0.955 (0.903,1.009)        | 0.098         | 0.955 (0.902,1.011) | 0.111   | <b>1.074 (1.019,1.133)</b> | <b>0.008</b>     |
| NO2 per 10 ppb ↑    | 0.907 (0.810,1.017)        | 0.095         | 1.047 (0.916,1.196) | 0.501   | 0.958 (0.848,1.082)        | 0.491            |
